# Supplementary material
Source: publisher figshare collection journal article supplement (https://tandf.figshare.com/ndownloader/files/12257807)
Supplement: Supplementary file 1 [file 12257807]

**Supplementary material**

**Supplementary material 1. Mean faecal elastase-1 levels with patients divided into two groups, dependant on whether or not they developed pancreatic exocrine insufficiency.** Although baseline FE1 levels were similar between the group of patients who developed SSA-related PEI and those who did not (mean FE1 282 vs. 376 g/g stool; p-value 0.1407), FE1 level did not vary significantly in the no-PEI group, while it decreased in the PEI group over time. Statistically-significant differences were reached after 6 (mean FE1 83 vs. 414 g/g stool; p-value <0.001) and 9 months (mean FE1 125 vs. 387 g/g stool; p-value <0.001) of treatment initiation with SSA.

**
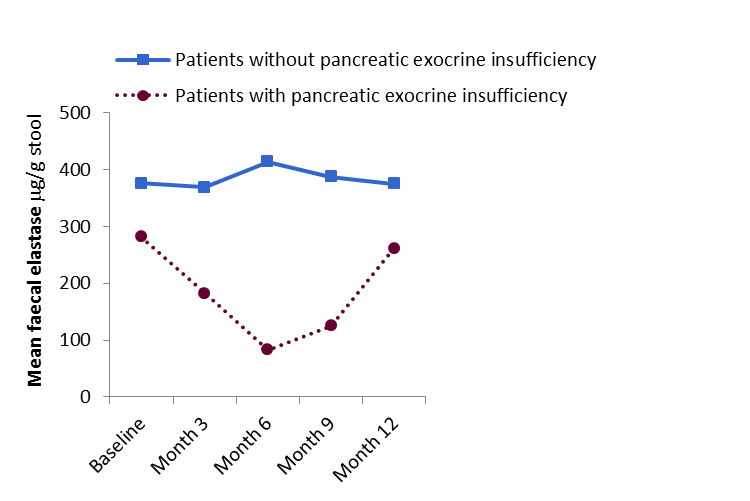
**

**Supplementary material 2. Mean symptoms calculated from clinical examination and quality of life questionnaires.**


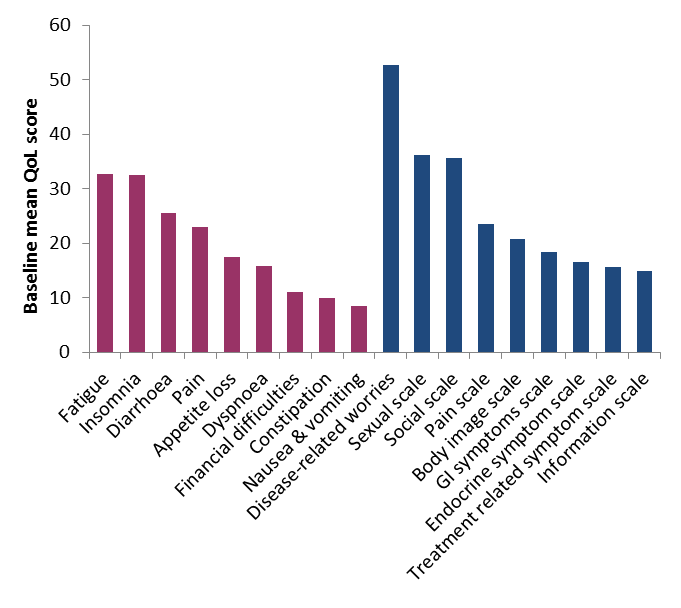


A total of 40, 21, 15, 16 and 19 QoL questionnaires were completed at baseline, month 3, 6, 9 and 12, respectively. Symptoms and scales at baseline for all patients, ranked by severity. Higher scores indicate increased symptom severity (purple bars; derived from the EORTC QLQ-C30 questionnaire) and scales (blue bars; derived from the EORTC QLQ-GI.NET21 questionnaire).
